# Supplementary material for: Atractylodin attenuated hepatic ischemia reperfusion injury in mice by regulating TLR4-NLRP3-ASC signal pathway
Source: Research Square preprint supplement (doi:10.21203/rs.3.rs-6193635/v1), 2025-05-07

Supplementary File 1. Western blotting gels were not cropped from several points or taken from different gels for showing in the manuscript. The gels viewed in the article were located adjacent to each other in the original gel, as shown in the figures. All figures follow the same sequence of samples.

## **GAPDH**

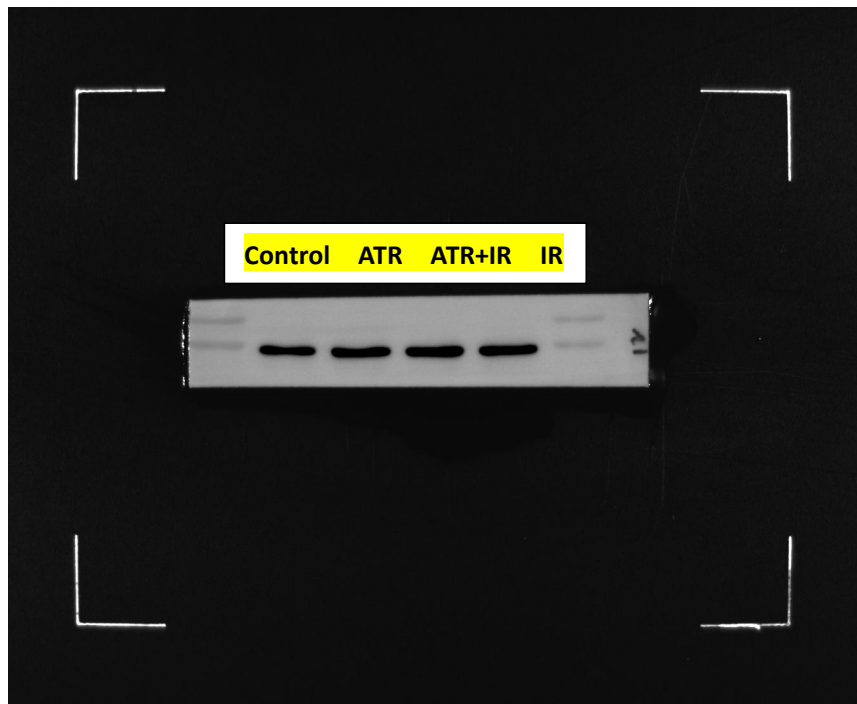

ASC

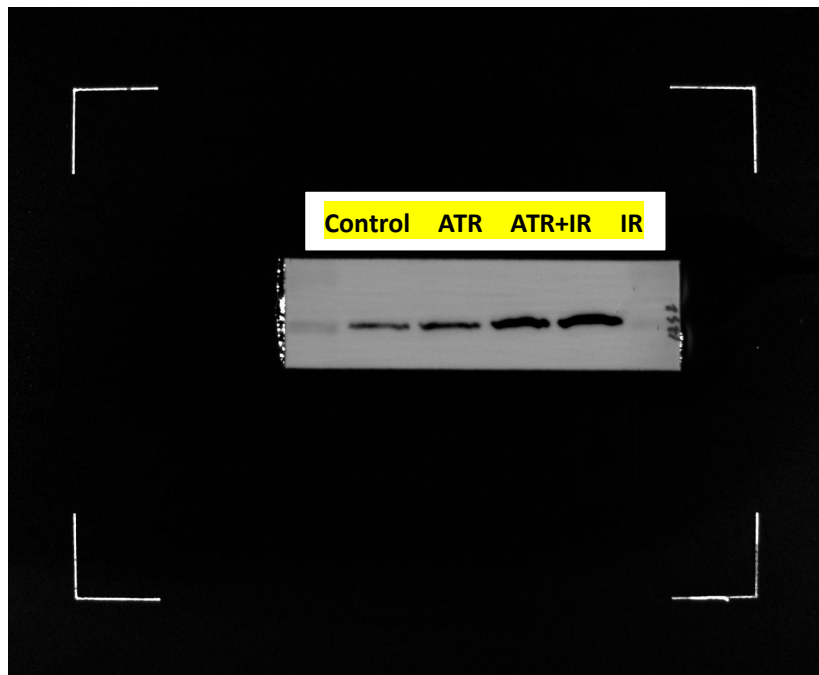

TLR4

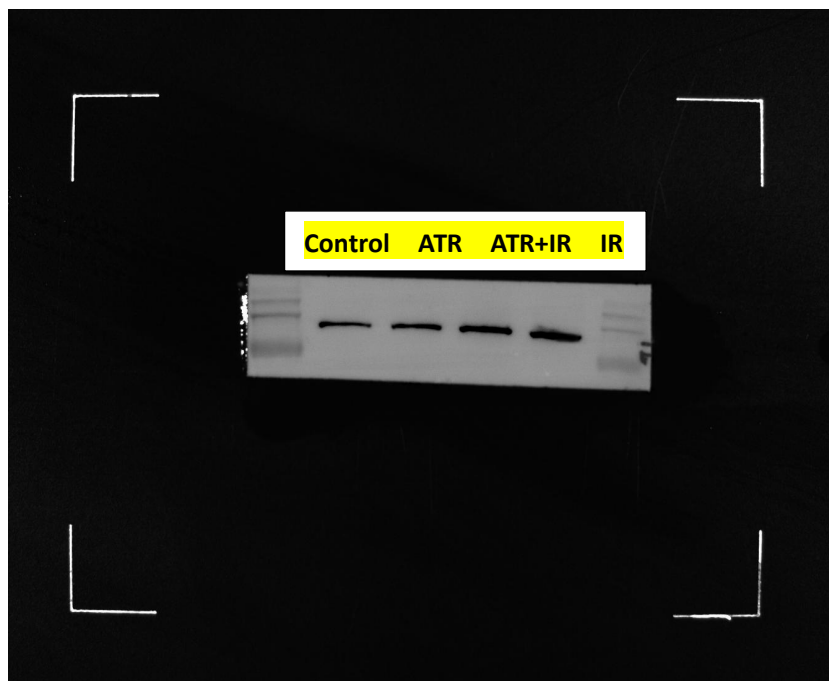

## NLRP3

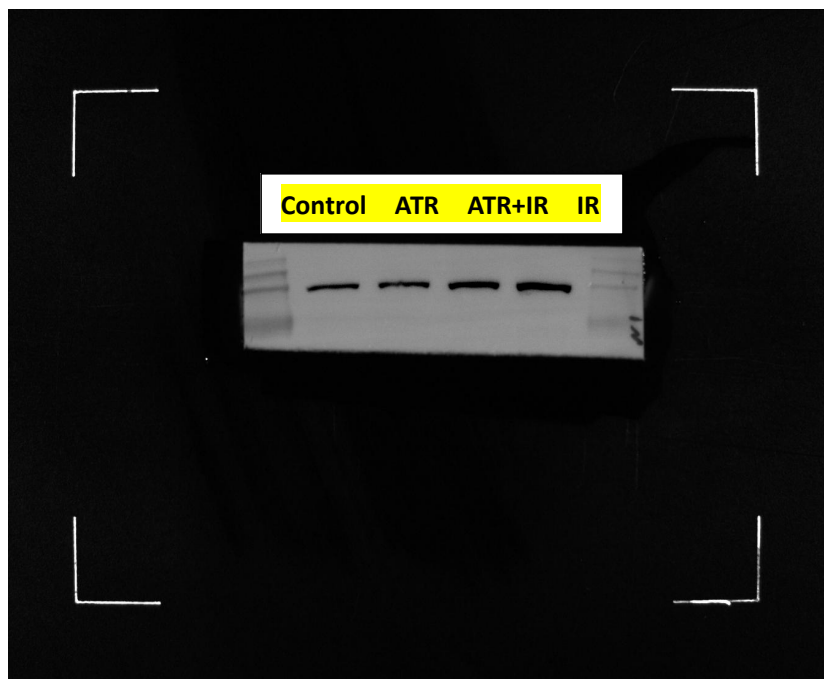

## IL-1 $\beta$

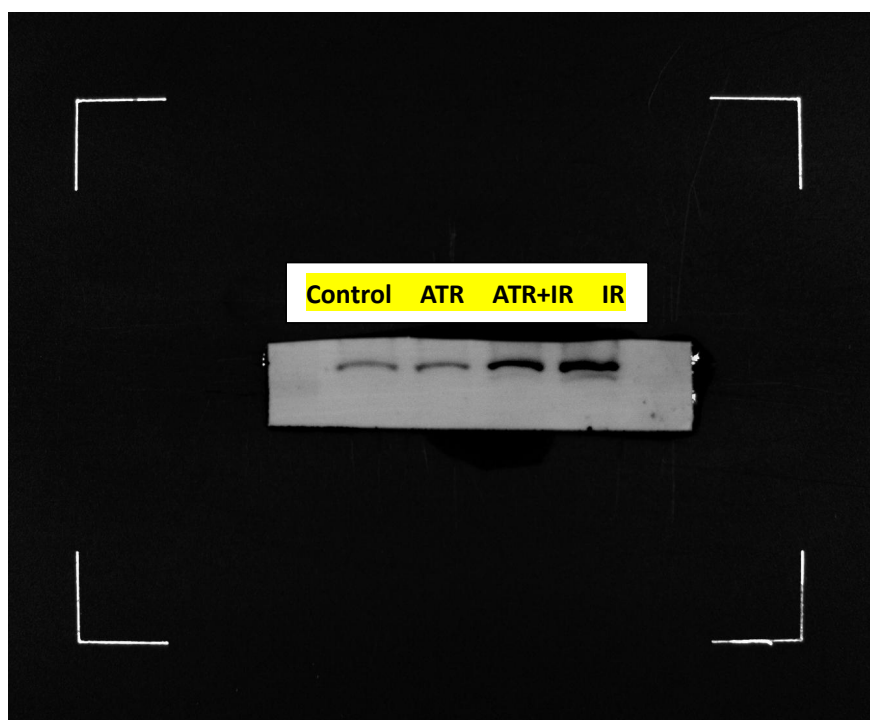

## IL-18

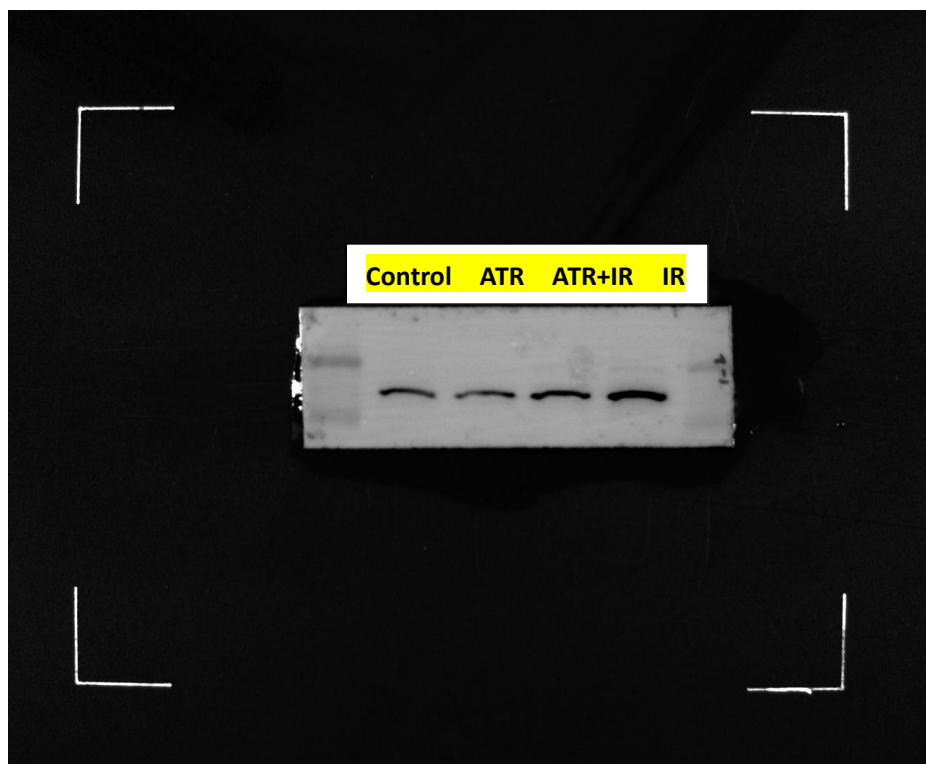

Supplement: Supplementary file 1 [file 068bc1a16284e14ebff0439a.pdf]
